# Supplementary material for: Application of temperature-controlled chiral hybrid structures constructed from copper(ii)-monosubstituted Keggin polyoxoanions and copper(ii)-organoamine complexes in enantioselective sensing of tartaric acid
Source: Royal Society of Chemistry journal article supplement (doi:10.1039/d0ra01904f), 2020-01-01
Supplement: d0ra01904f1.pdf [file d0ra01904f1.pdf]

# Application of Temperature-Controlled Chiral Hybrid Structures Constructed From Copper(II)-Monosubstituted Keggin Polyoxoanions and Copper(II)-Organoamine Complexes in Enantioselective Sensing of Tartaric Acid

Mu-Xiu Yang,<sup>†</sup> Meng-Jie Zhou,<sup>†</sup> Jia-Peng Cao,<sup>†</sup> Ye-Min Han,<sup>†</sup> Ya-Lin Hong,<sup>†</sup> and Yan Xu<sup>\*†</sup>

<sup>†</sup>College of Chemical Engineering, State Key Laboratory of Materials-Oriented Chemical Engineering, Nanjing Tech University, Nanjing 210009, P. R. China

## 1. Crystal Structures

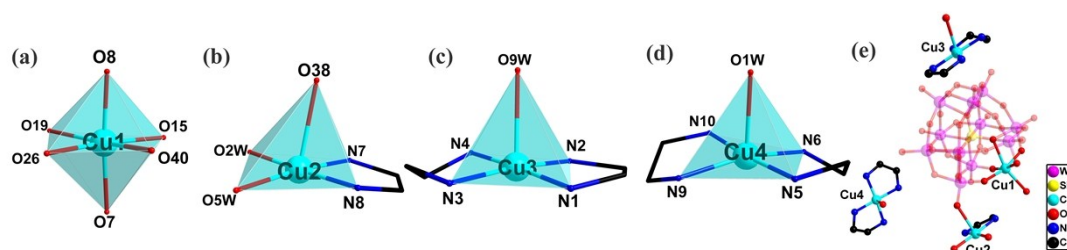

**Fig. S1** (a-d) The coordination mode of Cu1, Cu 2, Cu 3, Cu4. (e) The ball-and-stick representation of L-1. For clarity, H atoms and water molecules are omitted.

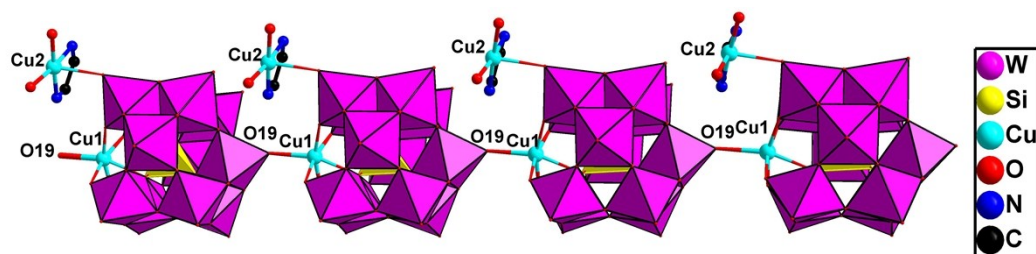

**Fig. S2** Ball-stick and polyhedron view of the 1D left-handed chain in L-1.

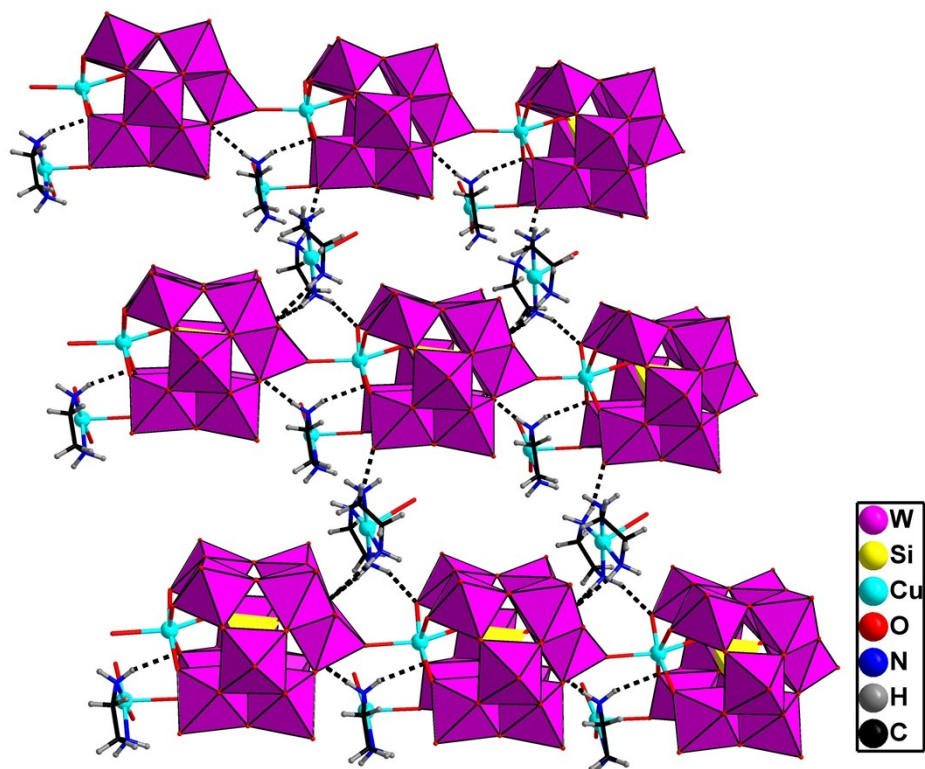

**Fig. S3** View of 2D supramolecular chiral sheet in **L-1**, showing the hydrogen-bonding interactions ( $\text{N-H}\cdots\text{O}$ ) between the terminal oxygen atoms of polyoxoanions and organic molecules.

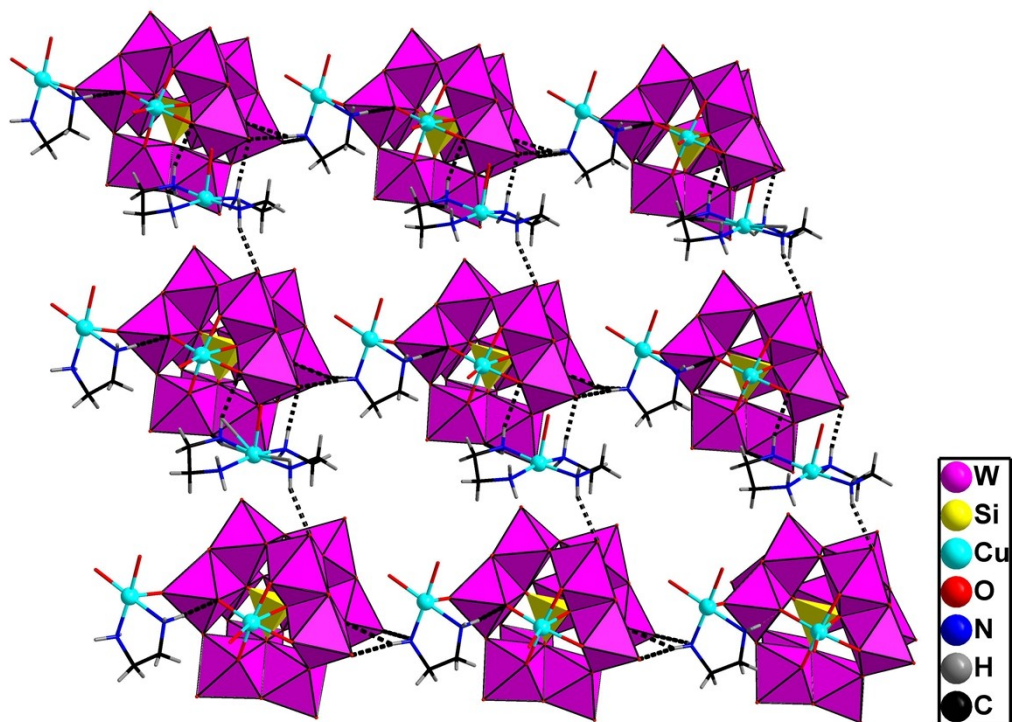

**Fig. S4** View of 3D supramolecular chiral framework in **L-1**, showing the hydrogen-

---

bonding interactions (N-H $\cdots$ O) between the terminal oxygen atoms of polyoxoanions and organic molecules.

## 2. IR

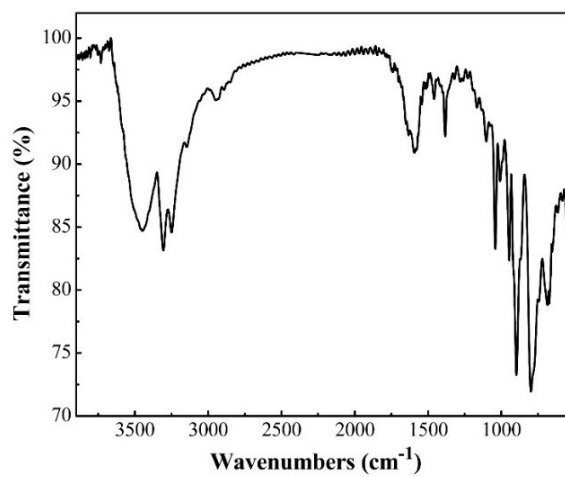

**Fig. S5** The IR spectrum of compound 1.

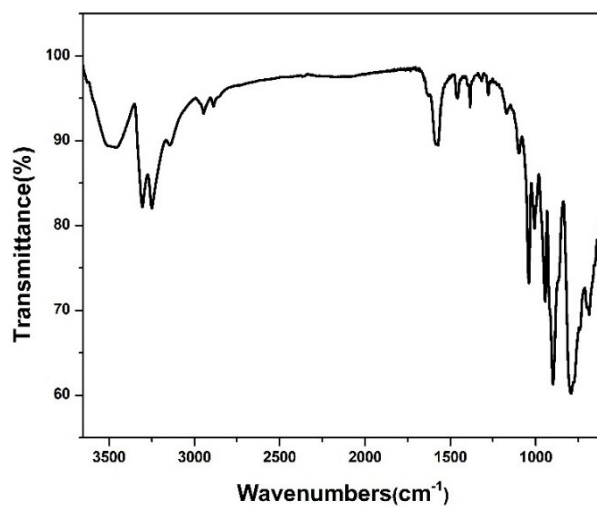

**Fig. S6** The IR spectrum of compound 2.

## 3. TG

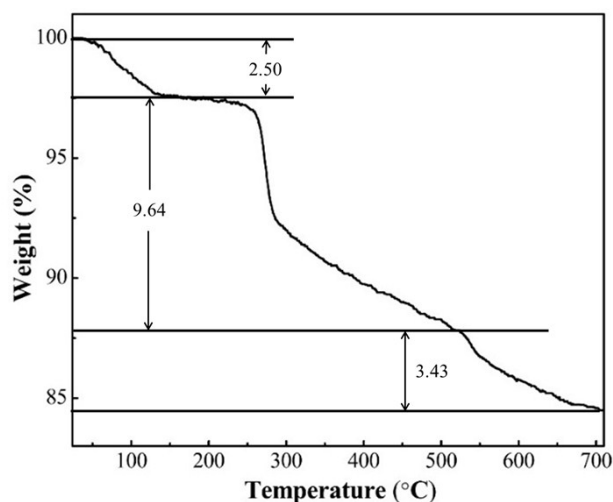

**Fig. S7** TGA curve of compound **1**.

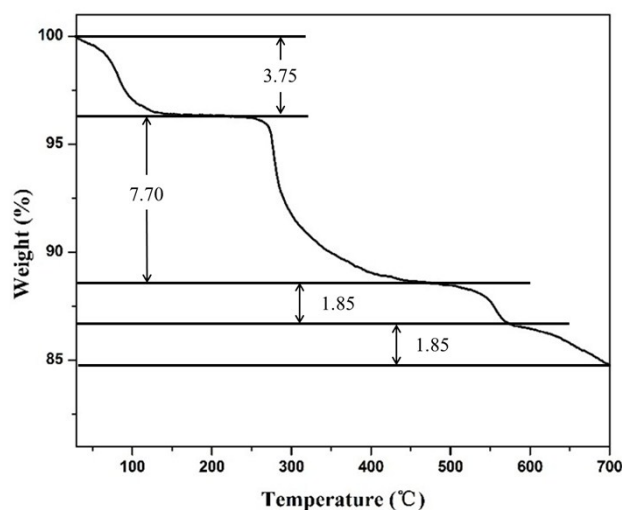

**Fig. S8** TGA curve of compound **2**.

**TG analysis.** The TG curve of compound **1** is shown in Fig, S7. The first weight loss 2.50 % (calc. 2.65 %) occurred in the range of 25 – 170 °C is associated with the remove of 5 lattice H<sub>2</sub>O. In the range of 170 – 520 °C, 4 organic ligands ethylenediamine and 4 coordinated H<sub>2</sub>O are decomposed with the loss of 9.64 % (calc. 9.20 %). In the range of 520 – 700 °C, the weight loss 3.43 % is attributed to the loss of 1 organic ligand ethylenediamine and the thermal decomposition of the main structure.

Thermal analysis of **2** can be viewed in Fig S8. The first weight loss 3.75 % (calc. 3.67 %) occurred in the range of 25 – 230 °C indicates the release of 2.5 lattice H<sub>2</sub>O,

---

1 coordinated H<sub>2</sub>O and 1 organic ligand ethylenediamine. In the range of 230 – 480 °C, 4 organic ligands ethylenediamine are decomposed with the loss of 7.70 % (calc. 7.16 %). In the range of 480 – 570 °C, 1 organic ligands ethylenediamine is decomposed with the loss of 1.85 % (calc. 1.79 %). In the range of 570 – 700 °C, the weight loss 1.85 % is attributed to the thermal decomposition of the main structure. Assuming that the difference corresponds to the moist crystals exposed to air.

#### 4. XRD

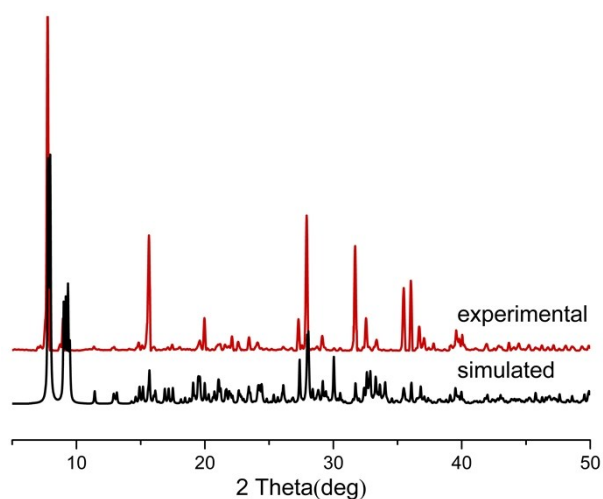

**Fig. S9** The XRD patterns of compound **1** under different conditions, Simulated (black), experimental (red).

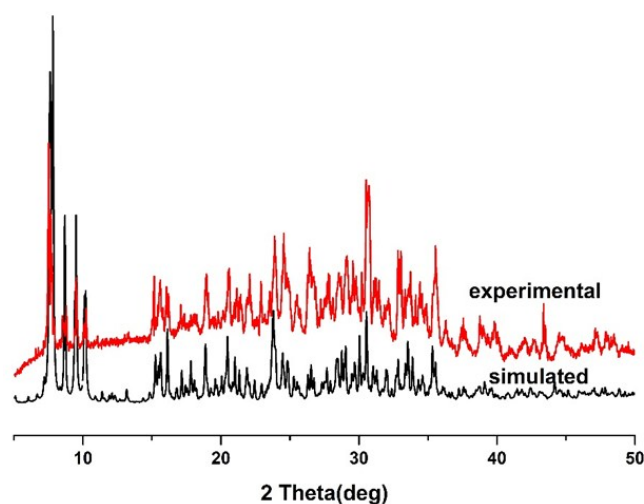

**Fig. S10** The XRD patterns of compound **2** under different conditions, Simulated (black), experimental (red).

#### 5. Nonlinear Optical properties

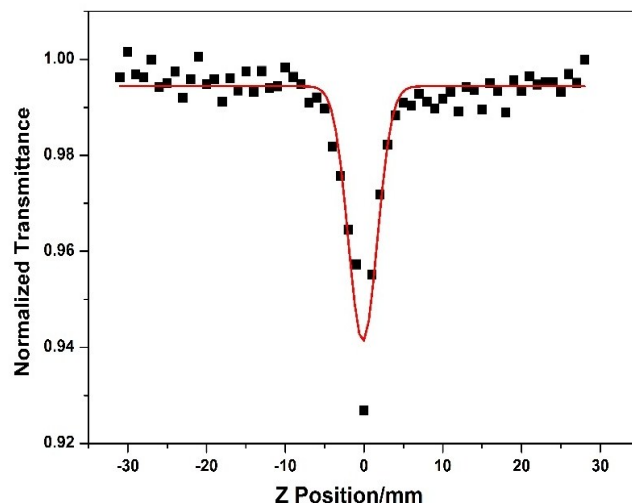

**Fig S11** The open aperture Z-scan data of **D-1**. The dots are the experimental data and the solid curve represents the theoretical data, which is modified by the equations (1), (2), (3).

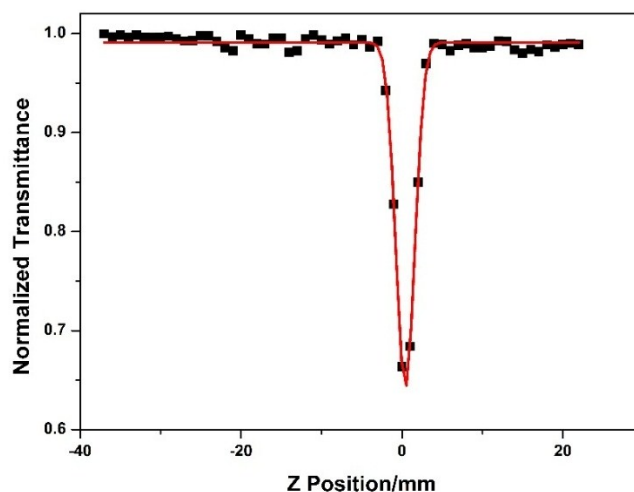

**Fig S12.** The Z-scan data for **L-1** in water, obtained under an open aperture configuration.

**Nonlinear Optical Measurement.** Third-order NLO properties of **D-1** and **L-1** are investigated by the open-aperture Z-scan in dimethyl formamide at a concentration of  $1.0 \times 10^{-3}$  mol/L for **D-1** ( $1.0 \times 10^{-3}$  mol/L for **L-1**). Chameleon II femtosecond laser pulse and Ti : 95 sapphire systems (740 nm, 80 Hz, 140 fs) were applied to measure third-order nonlinear optics (NLO) properties. Two-photon absorption (TPA) values of **D-1** and **L-1** were measured by the open-aperture Z-scan technique.<sup>1</sup> The nonlinear

absorption coefficient  $\beta$  and the molecular 2PA cross section  $\sigma$  can be determined by equations (1), (2), (3)<sup>2</sup>:

$$T(z, s = 1) = \sum_{m=0}^{\infty} \frac{[-q_0(z)]^m}{(m+1)^{3/2}} \quad \text{for } |q_0| < 1 \quad (1)$$

$$q_0(z) = \frac{\beta I_0 L_{eff}}{1 + x^2} \quad (2)$$

Where  $x = z/z_0$ ,  $z_0 = \pi\omega_0^2/\lambda$  is the diffraction length of the beam, where  $\omega_0$  is the spot size at the focus,  $\lambda$  is the wavelength of the beam, and  $z$  is the sample position.  $I_0$  is the input intensity at the focus  $z = 0$  and equals the input energy divided by  $\pi\omega_0^2$ ,  $L_{eff} = (1 - e^{-\alpha L})/\alpha$  is the effective length, in which  $\alpha$  is the linear absorption coefficient and  $L$  is the sample length. By using the above equations, we obtain the nonlinear absorption coefficient  $\beta$ . Furthermore, the molecular 2PA cross section  $\sigma$  can be determined by the following relationship:

$$\sigma = h\nu\beta/N_A d \times 10^{-3} \quad (3)$$

Here,  $h$  is the Planck's constant,  $\nu$  is the frequency of input intensity,  $N_A$  is the Avogadro's constant, and  $d$  is the concentration of the compound.

**Table S1.** Bond valence sum for compound **D-1** and **L-1**.

| compound <b>D-1</b> | calculated | compound <b>L-1</b> | calculated |
|---------------------|------------|---------------------|------------|
| Cu <sub>1</sub>     | 1.997      | Cu <sub>1</sub>     | 1.960      |
| Cu <sub>2</sub>     | 1.759      | Cu <sub>2</sub>     | 1.738      |
| Cu <sub>3</sub>     | 1.957      | Cu <sub>3</sub>     | 1.980      |
| Cu <sub>4</sub>     | 1.770      | Cu <sub>4</sub>     | 1.907      |

**Table S2.** Selected Bond Distances (Å) and angles (°) for compound **D-1**.

|             |         |            |         |
|-------------|---------|------------|---------|
| Cu(1)-O(7)  | 1.95(2) | Cu(3)-N(2) | 1.95(4) |
| Cu(1)-O(15) | 1.97(2) | Cu(3)-N(1) | 1.96(3) |

|                            |           |                   |           |
|----------------------------|-----------|-------------------|-----------|
| Cu(1)-O(26)                | 1.99(3)   | Cu(3)-N(4)        | 2.00(5)   |
| Cu(1)-O(8)                 | 2.00(3)   | Cu(3)-N(3)        | 2.04(3)   |
| Cu(1)-O(40) <sup>a</sup>   | 2.40(3)   | Cu(4)-N(10)       | 2.01(3)   |
| Cu(1)-O(19)#1 <sup>a</sup> | 2.40(2)   | Cu(4)-N(6)        | 2.04(4)   |
| Cu(2)-N(8)                 | 1.98(4)   | Cu(4)-N(9)        | 2.05(4)   |
| Cu(2)-O(2W)                | 2.03(3)   | Cu(4)-N(5)        | 2.06(3)   |
| Cu(2)-O(5W)                | 2.04(4)   | Cu(4)-O(1W)       | 2.34(3)   |
| Cu(2)-N(7)                 | 2.05(4)   | O(19)-Cu(1)#2     | 2.40(2)   |
| Cu(2)-O(38) <sup>a</sup>   | 2.44(3)   |                   |           |
| O(7)-Cu(1)-O(15)           | 84.8(10)  | N(8)-Cu(2)-O(38)  | 91.3(13)  |
| O(7)-Cu(1)-O(26)           | 91.2(11)  | O(2W)-Cu(2)-O(38) | 91.4(13)  |
| O(15)-Cu(1)-O(26)          | 166.5(11) | O(5W)-Cu(2)-O(38) | 105.2(13) |
| O(7)-Cu(1)-O(8)            | 167.0(11) | N(7)-Cu(2)-O(38)  | 85.3(14)  |
| O(15)-Cu(1)-O(8)           | 92.6(10)  | N(2)-Cu(3)-N(1)   | 82.1(14)  |
| O(26)-Cu(1)-O(8)           | 88.5(11)  | N(2)-Cu(3)-N(4)   | 96.5(18)  |
| O(7)-Cu(1)-O(40)           | 92.3(10)  | N(1)-Cu(3)-N(4)   | 176.4(19) |
| O(15)-Cu(1)-O(40)          | 92.2(9)   | N(2)-Cu(3)-N(3)   | 178.1(15) |
| O(26)-Cu(1)-O(40)          | 75.1(10)  | N(1)-Cu(3)-N(3)   | 97.3(13)  |
| O(8)-Cu(1)-O(40)           | 75.1(10)  | N(4)-Cu(3)-N(3)   | 84.2(17)  |
| O(7)-Cu(1)-O(19)#1         | 96.0(9)   | N(10)-Cu(4)-N(6)  | 96.6(13)  |
| O(15)-Cu(1)-O(19)#1        | 103.7(9)  | N(10)-Cu(4)-N(9)  | 82.0(13)  |
| O(26)-Cu(1)-O(19)#1        | 89.5(10)  | N(6)-Cu(4)-N(9)   | 166.8(15) |
| O(8)-Cu(1)-O(19)#1         | 97.0(10)  | N(10)-Cu(4)-N(5)  | 178.1(15) |
| O(40)-Cu(1)-O(19)#1        | 162.7(9)  | N(6)-Cu(4)-N(5)   | 83.6(13)  |
| N(8)-Cu(2)-O(2W)           | 175.7(18) | N(9)-Cu(4)-N(5)   | 98.2(14)  |
| N(8)-Cu(2)-O(5W)           | 94.4(16)  | N(10)-Cu(4)-O(1W) | 92.6(12)  |
| O(2W)-Cu(2)-O(5W)          | 81.7(17)  | N(6)-Cu(4)-O(1W)  | 95.5(13)  |
| N(8)-Cu(2)-N(7)            | 85.2(16)  | N(9)-Cu(4)-O(1W)  | 97.6(13)  |
| O(2W)-Cu(2)-N(7)           | 98.3(18)  | N(5)-Cu(4)-O(1W)  | 85.5(13)  |
| O(5W)-Cu(2)-N(7)           | 169.5(17) |                   |           |

Symmetry transformations used to generate equivalent atoms: #1  $x+1,y,z$ ; #2  $x-1,y,z$

<sup>a</sup> Due to the axial extension of the Jahn-Teller effect of copper(II) ion, Cu1-O19 is considered as a usual coordination bond in this article.



**Table S3.** Selected Bond Distances (Å) and angles (°) for compound **L-1**.

|                            |           |                   |           |
|----------------------------|-----------|-------------------|-----------|
| Cu(1)-O(26)                | 1.95(3)   | Cu(3)-N(1)        | 1.96(4)   |
| Cu(1)-O(8)                 | 1.96(3)   | Cu(3)-N(4)        | 1.97(6)   |
| Cu(1)-O(7)                 | 1.97(3)   | Cu(3)-N(2)        | 1.99(5)   |
| Cu(1)-O(15)                | 1.99(3)   | Cu(3)-N(3)        | 2.06(5)   |
| Cu(1)-O(40) <sup>a</sup>   | 2.41(3)   | Cu(4)-N(10)       | 1.97(5)   |
| Cu(1)-O(19)#1 <sup>a</sup> | 2.44(3)   | Cu(4)-N(5)        | 2.00(4)   |
| Cu(2)-N(8)                 | 2.00(4)   | Cu(4)-N(9)        | 2.04(4)   |
| Cu(2)-N(7)                 | 2.01(4)   | Cu(4)-N(6)        | 2.07(5)   |
| Cu(2)-O(5W)                | 2.02(6)   | Cu(4)-O(1W)       | 2.33(4)   |
| Cu(2)-O(2W)                | 2.07(4)   | O(19)-Cu(1)#2     | 2.44(3)   |
| O(26)-Cu(1)-O(8)           | 86.5(13)  | N(7)-Cu(2)-O(2W)  | 95.4(16)  |
| O(26)-Cu(1)-O(7)           | 90.1(12)  | O(5W)-Cu(2)-O(2W) | 85(2)     |
| O(8)-Cu(1)-O(7)            | 168.7(13) | N(1)-Cu(3)-N(4)   | 177(2)    |
| O(26)-Cu(1)-O(15)          | 164.0(12) | N(1)-Cu(3)-N(2)   | 87.7(19)  |
| O(8)-Cu(1)-O(15)           | 92.2(12)  | N(4)-Cu(3)-N(2)   | 95(2)     |
| O(7)-Cu(1)-O(15)           | 88.1(12)  | N(1)-Cu(3)-N(3)   | 89.9(18)  |
| O(26)-Cu(1)-O(40)          | 73.7(11)  | N(4)-Cu(3)-N(3)   | 88(2)     |
| O(8)-Cu(1)-O(40)           | 76.0(12)  | N(2)-Cu(3)-N(3)   | 174.1(18) |
| O(7)-Cu(1)-O(40)           | 92.8(11)  | N(10)-Cu(4)-N(5)  | 175(2)    |
| O(15)-Cu(1)-O(40)          | 90.5(10)  | N(10)-Cu(4)-N(9)  | 83.7(19)  |
| O(26)-Cu(1)-O(19)#1        | 89.0(12)  | N(5)-Cu(4)-N(9)   | 97.6(18)  |
| O(8)-Cu(1)-O(19)#1         | 96.5(13)  | N(10)-Cu(4)-N(6)  | 95.1(19)  |
| O(7)-Cu(1)-O(19)#1         | 94.1(12)  | N(5)-Cu(4)-N(6)   | 84.9(19)  |
| O(15)-Cu(1)-O(19)#1        | 107.0(11) | N(9)-Cu(4)-N(6)   | 165(2)    |
| O(40)-Cu(1)-O(19)#1        | 161.4(10) | N(10)-Cu(4)-O(1W) | 87.4(18)  |
| N(8)-Cu(2)-N(7)            | 84.5(16)  | N(5)-Cu(4)-O(1W)  | 87.6(17)  |
| N(8)-Cu(2)-O(5W)           | 96(2)     | N(9)-Cu(4)-O(1W)  | 98.9(16)  |
| N(7)-Cu(2)-O(5W)           | 173.0(19) | N(6)-Cu(4)-O(1W)  | 95.8(16)  |

---

---

|                  |           |
|------------------|-----------|
| N(8)-Cu(2)-O(2W) | 178.3(18) |
|------------------|-----------|

---

Symmetry transformations used to generate equivalent atoms: #1 x-1,y,z; #2 x+1,y,z

**Table S4.** Selected Bond Distances (Å) and angles (°) for compound **2**.

---

|               |           |              |           |
|---------------|-----------|--------------|-----------|
| Cu(1)-O(74)   | 1.88(2)   | Cu(6)-N(11)  | 2.00(3)   |
| Cu(1)-O(49)   | 1.938(18) | Cu(6)-N(12)  | 2.03(2)   |
| Cu(1)-O(60)   | 1.940(17) | Cu(7)-N(16)  | 2.03(3)   |
| Cu(1)-O(36)   | 1.955(16) | Cu(7)-N(13)  | 2.04(3)   |
| Cu(1)-O(19)   | 1.96(2)   | Cu(7)-N(15)  | 2.06(2)   |
| Cu(1)-O(41)   | 2.390(18) | Cu(7)-N(14)  | 2.06(3)   |
| Cu(2)-O(14)   | 1.948(19) | Cu(7)-O(2W)  | 2.35(2)   |
| Cu(2)-O(23)   | 1.953(16) | Cu(8)-N(6)   | 1.99(3)   |
| Cu(2)-O(78)#1 | 1.98(2)   | Cu(8)-N(8)   | 2.01(3)   |
| Cu(2)-O(56)   | 1.986(15) | Cu(8)-N(5)   | 2.01(3)   |
| Cu(2)-O(57)   | 1.991(18) | Cu(8)-N(7)   | 2.04(3)   |
| Cu(2)-O(51)   | 2.383(18) | Cu(8)-O(59)  | 2.380(19) |
| Cu(3)-O(20)   | 1.899(19) | Cu(9)-N(24)  | 1.96(3)   |
| Cu(3)-O(71)   | 1.958(18) | Cu(9)-N(23)  | 1.98(3)   |
| Cu(3)-O(32)   | 1.971(19) | Cu(9)-N(21)  | 2.01(4)   |
| Cu(3)-O(74)   | 1.97(2)   | Cu(9)-N(22)  | 2.02(2)   |
| Cu(3)-O(77)   | 2.009(19) | Cu(9)-O(3W)  | 2.29(2)   |
| Cu(3)-O(5)    | 2.344(17) | Cu(10)-N(20) | 2.01(3)   |
| Cu(4)-O(55)   | 1.941(19) | Cu(10)-N(19) | 2.02(3)   |
| Cu(4)-O(7)    | 1.947(18) | Cu(10)-N(18) | 2.04(3)   |
| Cu(4)-O(44)   | 1.947(19) | Cu(10)-N(17) | 2.07(4)   |
| Cu(4)-O(45)   | 1.970(16) | Cu(5)-N(3)   | 1.96(2)   |
| Cu(4)-O(78)   | 2.10(2)   | Cu(5)-N(4)   | 2.01(2)   |
| Cu(4)-O(37)   | 2.403(18) | Cu(5)-N(2)   | 2.02(2)   |
| Cu(6)-N(9)    | 2.00(3)   | Cu(5)-N(1)   | 2.02(2)   |
| Cu(6)-N(10)   | 2.00(3)   | Cu(5)-O(39)  | 2.418(19) |

---

---

|                     |          |                   |           |
|---------------------|----------|-------------------|-----------|
| O(74)-Cu(1)-O(49)   | 100.3(8) | O(7)-Cu(4)-O(37)  | 73.2(6)   |
| O(74)-Cu(1)-O(60)   | 99.2(8)  | O(44)-Cu(4)-O(37) | 73.8(7)   |
| O(49)-Cu(1)-O(60)   | 89.4(7)  | O(45)-Cu(4)-O(37) | 88.9(6)   |
| O(74)-Cu(1)-O(36)   | 99.9(8)  | O(78)-Cu(4)-O(37) | 168.8(7)  |
| O(49)-Cu(1)-O(36)   | 159.7(7) | N(9)-Cu(6)-N(10)  | 83.5(11)  |
| O(60)-Cu(1)-O(36)   | 89.6(7)  | N(9)-Cu(6)-N(11)  | 173.6(11) |
| O(74)-Cu(1)-O(19)   | 98.1(8)  | N(10)-Cu(6)-N(11) | 95.5(11)  |
| O(49)-Cu(1)-O(19)   | 84.9(8)  | N(9)-Cu(6)-N(12)  | 97.4(10)  |
| O(60)-Cu(1)-O(19)   | 162.5(7) | N(10)-Cu(6)-N(12) | 168.7(10) |
| O(36)-Cu(1)-O(19)   | 90.1(8)  | N(11)-Cu(6)-N(12) | 84.8(10)  |
| O(74)-Cu(1)-O(41)   | 169.7(8) | N(16)-Cu(7)-N(13) | 173.7(12) |
| O(49)-Cu(1)-O(41)   | 87.1(7)  | N(16)-Cu(7)-N(15) | 82.8(11)  |
| O(60)-Cu(1)-O(41)   | 73.4(6)  | N(13)-Cu(7)-N(15) | 97.0(11)  |
| O(36)-Cu(1)-O(41)   | 73.2(6)  | N(16)-Cu(7)-N(14) | 94.7(12)  |
| O(19)-Cu(1)-O(41)   | 89.8(7)  | N(13)-Cu(7)-N(14) | 84.0(11)  |
| O(14)-Cu(2)-O(23)   | 85.2(7)  | N(15)-Cu(7)-N(14) | 165.9(12) |
| O(14)-Cu(2)-O(78)#1 | 101.7(8) | N(16)-Cu(7)-O(2W) | 98.8(11)  |
| O(23)-Cu(2)-O(78)#1 | 104.0(8) | N(13)-Cu(7)-O(2W) | 87.5(10)  |
| O(14)-Cu(2)-O(56)   | 161.1(7) | N(15)-Cu(7)-O(2W) | 98.7(9)   |
| O(23)-Cu(2)-O(56)   | 89.9(7)  | N(14)-Cu(7)-O(2W) | 95.4(10)  |
| O(78)#1-Cu(2)-O(56) | 97.2(8)  | N(6)-Cu(8)-N(8)   | 175.1(12) |
| O(14)-Cu(2)-O(57)   | 91.9(7)  | N(6)-Cu(8)-N(5)   | 82.5(11)  |
| O(23)-Cu(2)-O(57)   | 160.1(7) | N(8)-Cu(8)-N(5)   | 96.0(11)  |
| O(78)#1-Cu(2)-O(57) | 95.9(8)  | N(6)-Cu(8)-N(7)   | 97.9(10)  |
| O(56)-Cu(2)-O(57)   | 86.5(7)  | N(8)-Cu(8)-N(7)   | 83.3(9)   |
| O(14)-Cu(2)-O(51)   | 87.4(7)  | N(5)-Cu(8)-N(7)   | 175.3(12) |
| O(23)-Cu(2)-O(51)   | 86.0(6)  | N(6)-Cu(8)-O(59)  | 84.3(9)   |
| O(78)#1-Cu(2)-O(51) | 166.9(7) | N(8)-Cu(8)-O(59)  | 100.1(9)  |
| O(56)-Cu(2)-O(51)   | 74.0(6)  | N(5)-Cu(8)-O(59)  | 81.5(10)  |
| O(57)-Cu(2)-O(51)   | 74.2(6)  | N(7)-Cu(8)-O(59)  | 103.2(9)  |

---

|                   |          |                    |           |
|-------------------|----------|--------------------|-----------|
| O(20)-Cu(3)-O(71) | 162.9(8) | N(24)-Cu(9)-N(23)  | 84.4(12)  |
| O(20)-Cu(3)-O(32) | 87.2(7)  | N(24)-Cu(9)-N(21)  | 97.8(14)  |
| O(71)-Cu(3)-O(32) | 90.8(8)  | N(23)-Cu(9)-N(21)  | 176.4(13) |
| O(20)-Cu(3)-O(74) | 97.2(8)  | N(24)-Cu(9)-N(22)  | 172.0(13) |
| O(71)-Cu(3)-O(74) | 100.0(8) | N(23)-Cu(9)-N(22)  | 95.8(10)  |
| O(32)-Cu(3)-O(74) | 97.2(8)  | N(21)-Cu(9)-N(22)  | 81.6(13)  |
| O(20)-Cu(3)-O(77) | 90.4(8)  | N(24)-Cu(9)-O(3W)  | 90.6(12)  |
| O(71)-Cu(3)-O(77) | 87.7(8)  | N(23)-Cu(9)-O(3W)  | 90.6(11)  |
| O(32)-Cu(3)-O(77) | 166.5(8) | N(21)-Cu(9)-O(3W)  | 92.3(13)  |
| O(74)-Cu(3)-O(77) | 96.3(9)  | N(22)-Cu(9)-O(3W)  | 97.4(10)  |
| O(20)-Cu(3)-O(5)  | 87.2(7)  | N(20)-Cu(10)-N(19) | 83.0(12)  |
| O(71)-Cu(3)-O(5)  | 75.8(7)  | N(20)-Cu(10)-N(18) | 95.3(13)  |
| O(32)-Cu(3)-O(5)  | 89.8(7)  | N(19)-Cu(10)-N(18) | 176.3(13) |
| O(74)-Cu(3)-O(5)  | 171.9(8) | N(20)-Cu(10)-N(17) | 178.2(14) |
| O(77)-Cu(3)-O(5)  | 76.8(7)  | N(19)-Cu(10)-N(17) | 95.3(15)  |
| O(55)-Cu(4)-O(7)  | 90.5(8)  | N(18)-Cu(10)-N(17) | 86.4(15)  |
| O(55)-Cu(4)-O(44) | 160.7(7) | N(3)-Cu(5)-N(4)    | 83.1(8)   |
| O(7)-Cu(4)-O(44)  | 89.5(8)  | N(3)-Cu(5)-N(2)    | 97.4(9)   |
| O(55)-Cu(4)-O(45) | 85.0(7)  | N(4)-Cu(5)-N(2)    | 178.0(10) |
| O(7)-Cu(4)-O(45)  | 161.8(7) | N(3)-Cu(5)-N(1)    | 164.9(10) |
| O(44)-Cu(4)-O(45) | 89.0(7)  | N(4)-Cu(5)-N(1)    | 94.9(9)   |
| O(55)-Cu(4)-O(78) | 96.4(8)  | N(2)-Cu(5)-N(1)    | 85.2(9)   |
| O(7)-Cu(4)-O(78)  | 96.3(8)  | N(3)-Cu(5)-O(39)   | 111.3(9)  |
| O(44)-Cu(4)-O(78) | 102.7(8) | N(4)-Cu(5)-O(39)   | 98.4(8)   |
| O(45)-Cu(4)-O(78) | 101.7(8) | N(2)-Cu(5)-O(39)   | 79.6(8)   |
| O(55)-Cu(4)-O(37) | 87.7(7)  | N(1)-Cu(5)-O(39)   | 83.8(8)   |

Symmetry transformations used to generate equivalent atoms: #1  $x+1, -y+1/2, z+1/2$ ;  
#2  $x-1, -y+1/2, z-1/2$

**Table S5.** Distances and angles [Å, °] of hydrogen bonds for compound **D-1**.

| D–H···A           | d(D–H) | d(H···A) | d(D···A) | ∠D–H···A |
|-------------------|--------|----------|----------|----------|
| N5 -- H5C···O23   | 0.89   | 2.2      | 3.00(5)  | 149      |
| N7 -- H7D···O36   | 0.89   | 2.17     | 2.99(6)  | 153      |
| N8 -- H8D···O15   | 0.89   | 2.21     | 3.06(5)  | 159      |
| N10 -- H10D···O7  | 0.89   | 2.46     | 3.06(4)  | 124      |
| N10 -- H10D···O26 | 0.89   | 2.25     | 3.09(5)  | 158      |

**Table S6.** Distances and angles [Å, °] of hydrogen bonds for compound **L-1**.

| D–H···A          | d(D–H) | d(H···A) | d(D···A) | ∠D–H···A |
|------------------|--------|----------|----------|----------|
| N1-- H1C···O8    | 0.89   | 2.12     | 2.92(6)  | 149      |
| N1-- H1D···O10   | 0.89   | 2.27     | 3.07(6)  | 149      |
| N2-- H2D···O5    | 0.89   | 2.13     | 2.94(6)  | 152      |
| N3-- H3C···O10   | 0.89   | 2.46     | 3.20(6)  | 141      |
| N5-- H5D···O23   | 0.89   | 2.17     | 3.01(7)  | 158      |
| N6-- H6D···O36   | 0.89   | 2        | 2.86(6)  | 163      |
| N7-- H7C···O36   | 0.89   | 2.15     | 3.00(5)  | 160      |
| N7-- H7C···O37   | 0.89   | 2.55     | 3.18(4)  | 128      |
| N7-- H7D···O30   | 0.89   | 2.47     | 3.27(6)  | 149      |
| N8-- H8C···O15   | 0.89   | 2.18     | 3.03(7)  | 161      |
| N8-- H8D···O12   | 0.89   | 2.24     | 3.08(6)  | 155      |
| N10-- H10C···O26 | 0.89   | 2.2      | 3.06(7)  | 162      |
| N10-- H10D···O31 | 0.89   | 2.53     | 3.32(7)  | 149      |

**Table S7.** Distances and angles [Å, °] of hydrogen bonds for compound **2**.

| D–H···A         | d(D–H) | d(H···A) | d(D···A) | ∠D–H···A |
|-----------------|--------|----------|----------|----------|
| N1 -- H1C···O21 | 0.89   | 2.26     | 3.07(3)  | 151      |
| N2 -- H2D···O3  | 0.89   | 2.5      | 3.23(3)  | 140      |

---

|                   |      |      |         |     |
|-------------------|------|------|---------|-----|
| N3 -- H3C···O3    | 0.89 | 2.5  | 3.17(3) | 132 |
| N3 -- H3C···O76   | 0.89 | 2.39 | 3.22(3) | 154 |
| N3 -- H3D···O48   | 0.89 | 2.6  | 3.17(3) | 123 |
| N4 -- H4C···O49   | 0.89 | 2.31 | 3.08(3) | 145 |
| N4 -- H4C···O74   | 0.89 | 2.5  | 3.21(3) | 136 |
| N4 -- H4D···O21   | 0.89 | 2.15 | 2.98(3) | 154 |
| N6 -- H6B···O68   | 0.89 | 2.11 | 2.96(3) | 159 |
| N7 -- H7C···O18   | 0.89 | 2.54 | 3.38(3) | 158 |
| N7 -- H7C···O68   | 0.89 | 2.48 | 3.18(3) | 135 |
| N7 -- H7D···O26   | 0.89 | 2.36 | 3.03(3) | 132 |
| N8 -- H8C···O23   | 0.89 | 2.5  | 3.24(3) | 141 |
| N8 -- H8D···O52   | 0.89 | 2.11 | 2.98(4) | 166 |
| N9 -- H9C···O22   | 0.89 | 2.47 | 3.30(3) | 155 |
| N9 -- H9C···O61   | 0.89 | 2.59 | 3.27(3) | 134 |
| N10 -- H10C···O35 | 0.89 | 2.15 | 2.95(3) | 148 |
| N10 -- H10D···O4  | 0.89 | 2.13 | 3.00(3) | 166 |
| N11 -- H11C···O77 | 0.89 | 2.34 | 3.17(4) | 156 |
| N11 -- H11D···O19 | 0.89 | 2.51 | 3.23(3) | 139 |
| N11 -- H11D···O36 | 0.89 | 2.26 | 3.06(3) | 149 |
| N12 -- H12C···O54 | 0.89 | 2.31 | 3.17(3) | 163 |
| N12 -- H12D···O8  | 0.89 | 2.08 | 2.87(3) | 148 |
| N13 -- H13D···O67 | 0.89 | 2.3  | 3.17(3) | 166 |
| N14 -- H14C···O65 | 0.89 | 2.29 | 3.16(4) | 164 |
| N14 -- H14D···O73 | 0.89 | 2.52 | 3.38(4) | 162 |
| N15 -- H15C···O76 | 0.89 | 2.38 | 3.24(3) | 163 |
| N15 -- H15D···O21 | 0.89 | 2.6  | 3.25(3) | 131 |
| N18 -- H18C···O17 | 0.89 | 2.33 | 3.19(4) | 164 |
| N19 -- H19C···O60 | 0.89 | 2.26 | 3.10(4) | 158 |
| N19 -- H19D···O32 | 0.89 | 2.42 | 3.24(4) | 153 |

---

|                   |      |      |         |     |
|-------------------|------|------|---------|-----|
| N20 -- H20D···O72 | 0.89 | 2.14 | 2.97(3) | 156 |
| N21 -- H21C···O61 | 0.89 | 2.1  | 2.91(4) | 152 |
| N21 -- H21D···O25 | 0.89 | 2.21 | 3.08(4) | 165 |
| N22 -- H22C···O33 | 0.89 | 1.94 | 2.82(3) | 166 |
| N22 -- H22D···O13 | 0.89 | 2.06 | 2.94(3) | 170 |
| N23 -- H23C···O53 | 0.89 | 2.35 | 3.20(3) | 160 |
| N23 -- H23D···O16 | 0.89 | 2.18 | 2.93(3) | 142 |
| N24 -- H24C···O61 | 0.89 | 2.33 | 3.18(4) | 161 |
| N24 -- H24D···O25 | 0.89 | 2.41 | 3.29(4) | 170 |

- (a) N. L. Toh, M. Nagarathinam and J. J. Vittal, *Angew. Chem. Int. Ed.*, 2005, **44**, 2237-2241; (b) C. Hu and U. Englert, *Angew. Chem. Int. Ed.*, 2005, **44**, 2281-2283; (c) T. Tahier and C. L. Oliver, *CrystEngComm*, 2017, **19**, 3607-3618; (d) D. K. Kumar, D. A. Jose, A. Das and P. Dastidar, *Inorg. Chem.*, 2005, **44**, 6933-6935.
- (a) M. C. Bernini, F. Gandara, M. Iglesias, N. Snejko, E. Gutierrez-Puebla, E. V. Brusau, G. E. Narda and M. A. Monge, *Chem. Eur. J.*, 2009, **15**, 4896-4905; (b) P. Cui, L. Ren, Z. Chen, H. Hu, B. Zhao, W. Shi and P. Cheng, *Inorg. Chem.* 2012, **51**, 2303-2310.
